# Supplementary material for: Detection and Characterization of Circulating Tumor Cells Using Imaging Flow Cytometry—A Perspective Study
Source: MDPI journal article supplement (doi:10.3390/cancers14174178), 2022-08-29
Supplement: s1 [file s1]

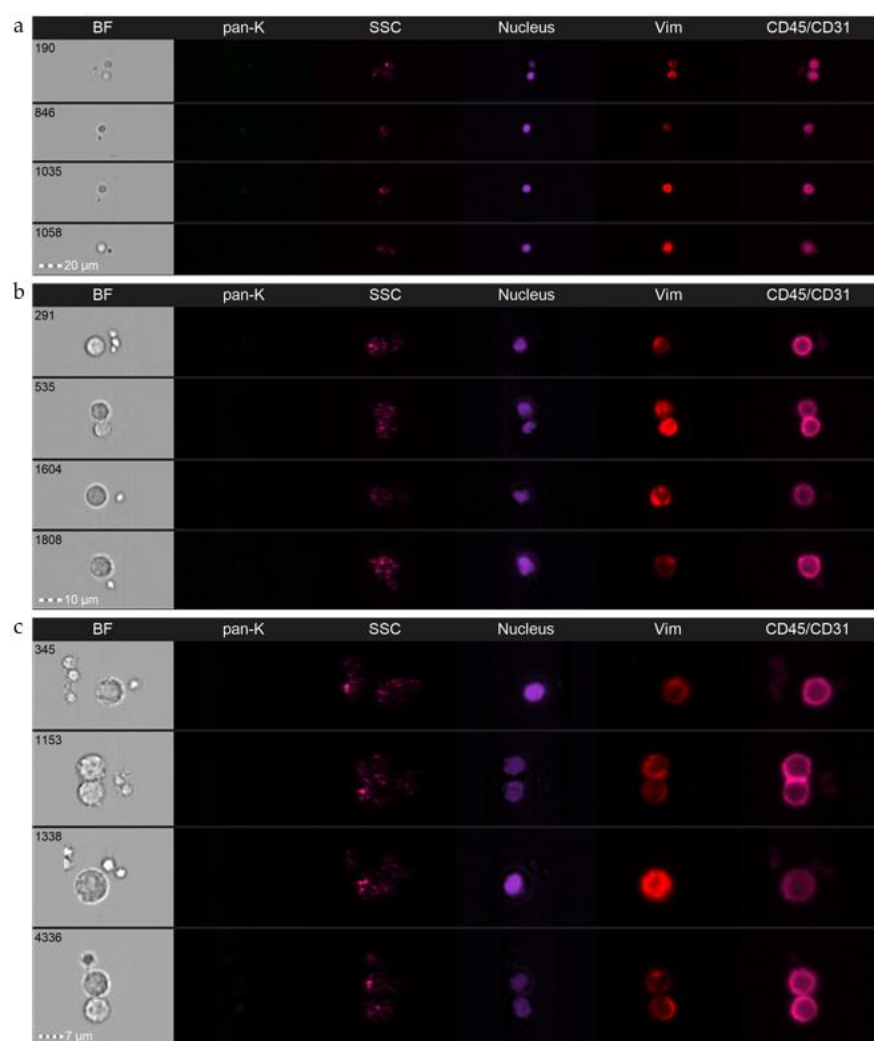

**Figure S1.** Representative pictures of morphological details of leukocytes isolated from blood of healthy donors and envisioned by different objectives of imaging flow cytometry: (a) 20×, (b) 40×, and (c) 60×. Amnis® ImageStream®X Mk II (Luminex).
